PERSPECTIVE

# Conservation Research Is Not Happening Where It Is Most Needed

Kerrie A. Wilson<sup>1\*</sup>, Nancy A. Auerbach<sup>1</sup>, Katerina Sam<sup>2,3</sup>, Ariana G. Magini<sup>1</sup>, Alexander St. L. Moss<sup>4</sup>, Simone D. Langhans<sup>5</sup>, Sugeng Budiharta<sup>1,6</sup>, Dilva Terzano<sup>7</sup>, Erik Meijaard<sup>1,8</sup>

**1** School of Biological Sciences, The University of Queensland, Brisbane, Queensland, Australia, **2** Institute of Entomology, Biology Centre CAS, České Budějovice, Czech Republic, **3** Faculty of Science, University of South Bohemia in České Budějovice, České Budějovice, Czech Republic, **4** KPMG Botswana, Gaborone, Botswana, **5** Leibniz-Institute of Freshwater Ecology and Inland Fisheries, Berlin, Germany, **6** Indonesian Institute of Sciences, Pasuruan, East Java, Indonesia, **7** School of Geography, Planning and Environmental Management, The University of Queensland, Brisbane, Queensland, Australia, **8** Borneo Futures Initiative, Ciputat, Jakarta, Indonesia

\* [k.wilson2@uq.edu.au](mailto:k.wilson2@uq.edu.au)

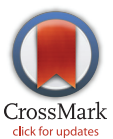

 OPEN ACCESS

**Citation:** Wilson KA, Auerbach NA, Sam K, Magini AG, Moss ASL, Langhans SD, et al. (2016) Conservation Research Is Not Happening Where It Is Most Needed. *PLoS Biol* 14(3): e1002413. doi:10.1371/journal.pbio.1002413

**Published:** March 29, 2016

**Copyright:** © 2016 Wilson et al. This is an open access article distributed under the terms of the [Creative Commons Attribution License](https://creativecommons.org/licenses/by/4.0/), which permits unrestricted use, distribution, and reproduction in any medium, provided the original author and source are credited.

**Funding:** KAW and NAA acknowledge funding from the Australian Research Council (<http://www.arc.gov.au/>) Future Fellowship FT100100413 and Centre of Excellence programs CE110001014. EM acknowledges funding from the Arcus Foundation (<http://www.arcusfoundation.org/>) G-PGM-1411-1112. KS acknowledges Czech Science Foundation (<https://gacr.cz/en/>) 14-32024P and the Christensen Fund (<https://www.christensenfund.org/>) G-2013-7476407. SDL acknowledges funding from the Alexander von Humboldt Foundation (<https://www.humboldt-foundation.de/web/home.html>) (fellowship program, no grant number provided). The funders had no role in study design, data collection and analysis, decision to publish, or preparation of the manuscript.

**Competing Interests:** The authors have declared that no competing interests exist.

## Abstract

Target 19, set by the Convention on Biological Diversity, seeks to improve the knowledge, science base, and technologies relating to biodiversity. We will fail to achieve this target unless prolific biases in the field of conservation science are addressed. We reveal that comparatively less research is undertaken in the world’s most biodiverse countries, the science conducted in these countries is often not led by researchers based in-country, and these scientists are also underrepresented in important international fora. Mitigating these biases requires wide-ranging solutions: reforming open access publishing policies, enhancing science communication strategies, changing author attribution practices, improving representation in international processes, and strengthening infrastructure and human capacity for research in countries where it is most needed.

In the environmental sciences, the scientific process generates evidence for policies and practices. Published evidence indicates that the quality standards associated with peer review have been met. Publishing also provides others with access to the evidence being shared, and increasingly, to the data and methodological processes underlying it. There are, however, strong biases in the peer-reviewed literature.

Biodiversity and the threats to its persistence are not uniformly distributed across the globe and therefore some areas demand comparatively greater scientific attention. If research is biased away from the most biodiverse areas, then this will accentuate the impacts of the global biodiversity crisis and reduce our capacity to protect and manage the natural ecosystems that underpin human well-being. Target 19 of the Convention on Biodiversity (CBD) states that “By 2020, knowledge, the science base, and technologies relating to biodiversity, its values, functioning, status and trends, and the consequences of its loss, are improved, widely shared and transferred, and applied” [1]. Biases in conservation science will prevent us from achieving this target.

We conducted the first comprehensive analysis of publishing trends of the conservation science literature. We identified all publications from 2014 on the topic of “conservation” in the

**Abbreviations:** CBD, Convention on Biodiversity; IPBES, Intergovernmental Panel on Biodiversity and Ecosystem Services; IUCN, International Union for Conservation of Nature.

research areas of environmental sciences, ecology, biodiversity conservation, plant sciences, zoology, and geography. We searched both the Thomson Reuters Zoological Records and Web of Science Core Collection databases, which returned 10,036 scientific publications (from 1,061 journals), after the duplicate, unrelated, and incomplete records were removed. For a subset of these publications ( $n = 7,593$ , or 81%), we manually identified at least one topic country, and we determined the relative conservation importance of these countries for mammal conservation [2] as well as a broader definition of conservation importance that considers richness of vascular plants, endemic species, and functional species [3].

The countries for which knowledge is sparse coincide with where research is most urgently needed. The top five countries, ranked according to relative importance for mammal conservation (i.e., Indonesia, Madagascar, Peru, Mexico, and Australia), were represented in 11.9% of the publications (Table 1A). However, our determination, based on relative importance for investment in mammal conservation, was that these countries should be represented in 37.2% of the publications. We determined that the United States should be represented in approximately 0.5% of the publications—instead, it was the subject of approximately 17.8% of the publications and was the most studied country overall (Fig 1). If we consider the broader definition of conservation importance that reflects the richness of vascular plants, endemic species, and functional species, then the top five countries (i.e., Ecuador, Costa Rica, Panama, the Dominican Republic, and Papua New Guinea) are the focus of only 1.6% of publications (Table 1B). On the basis of the proposed level of investment for mammal conservation alone, we would expect these countries to be represented in at least 7.3% of the publications. Comparatively less research is published on the most biodiverse countries. This situation needs to be redressed before 2020, else we will fail to achieve Target 19. Furthermore, aggregated biodiversity metrics

**Table 1. Publishing trends and representation in the International Union for Conservation of Nature (IUCN) Specialist Groups or the Intergovernmental Panel on Biodiversity and Ecosystem Services (IPBES) for (A) the countries ranked highest in terms of importance for mammal conservation [2], (B) the countries ranked highest in terms of biodiversity [3], and (C) the United States and United Kingdom, for the purposes of comparison (S1 Data).**

| Country                             | Number publications (with % of total) | Percentage publications led by an in-country institution | Average Altmetrics score (with maximum) | Number publications published open access | Number IPBES experts | Number IUCN chairs |
|-------------------------------------|---------------------------------------|----------------------------------------------------------|-----------------------------------------|-------------------------------------------|----------------------|--------------------|
| <b>A</b>                            |                                       |                                                          |                                         |                                           |                      |                    |
| 1. Indonesia                        | 95 (1.1)                              | 23                                                       | 12.5 (133)                              | 9                                         | 5                    | 1                  |
| 2. Madagascar                       | 64 (0.8)                              | 14                                                       | 19.8 (194)                              | 7                                         | 10                   | 1                  |
| 3. Peru                             | 49 (0.6)                              | 10                                                       | 15.2 (105)                              | 11                                        | 2                    | 0                  |
| 4. Mexico                           | 228 (2.8)                             | 68                                                       | 12.4 (256)                              | 62                                        | 9                    | 4                  |
| 5. Australia                        | 527 (6.5)                             | 94                                                       | 11.2 (192)                              | 24                                        | 21                   | 8                  |
| <b>B</b>                            |                                       |                                                          |                                         |                                           |                      |                    |
| 1. Ecuador                          | 46 (0.6)                              | 22                                                       | 9.4 (52)                                | 6                                         | 1                    | 0                  |
| 2. Costa Rica                       | 37 (0.5)                              | 14                                                       | 3.8 (7)                                 | 3                                         | 4                    | 0                  |
| 3. Panama                           | 22 (0.3)                              | 5                                                        | 3.8 (7)                                 | 5                                         | 0                    | 0                  |
| 4. Dominican Republic               | 6 (0.07)                              | 0                                                        | 1.5 (2)                                 | 0                                         | 1                    | 0                  |
| 5. Papua New Guinea                 | 16 (0.2)                              | 0                                                        | 9.3 (22)                                | 1                                         | 0                    | 0                  |
| <b>C</b>                            |                                       |                                                          |                                         |                                           |                      |                    |
| US (ranked 40 for A and 157 for B)  | 1,441 (17.8)                          | 93                                                       | 11.8 (434)                              | 71                                        | 23                   | 44                 |
| UK (ranked 170 for A and 167 for B) | 249 (3.1)                             | 77                                                       | 15 (146)                                | 11                                        | 18                   | 39                 |

doi:10.1371/journal.pbio.1002413.t001

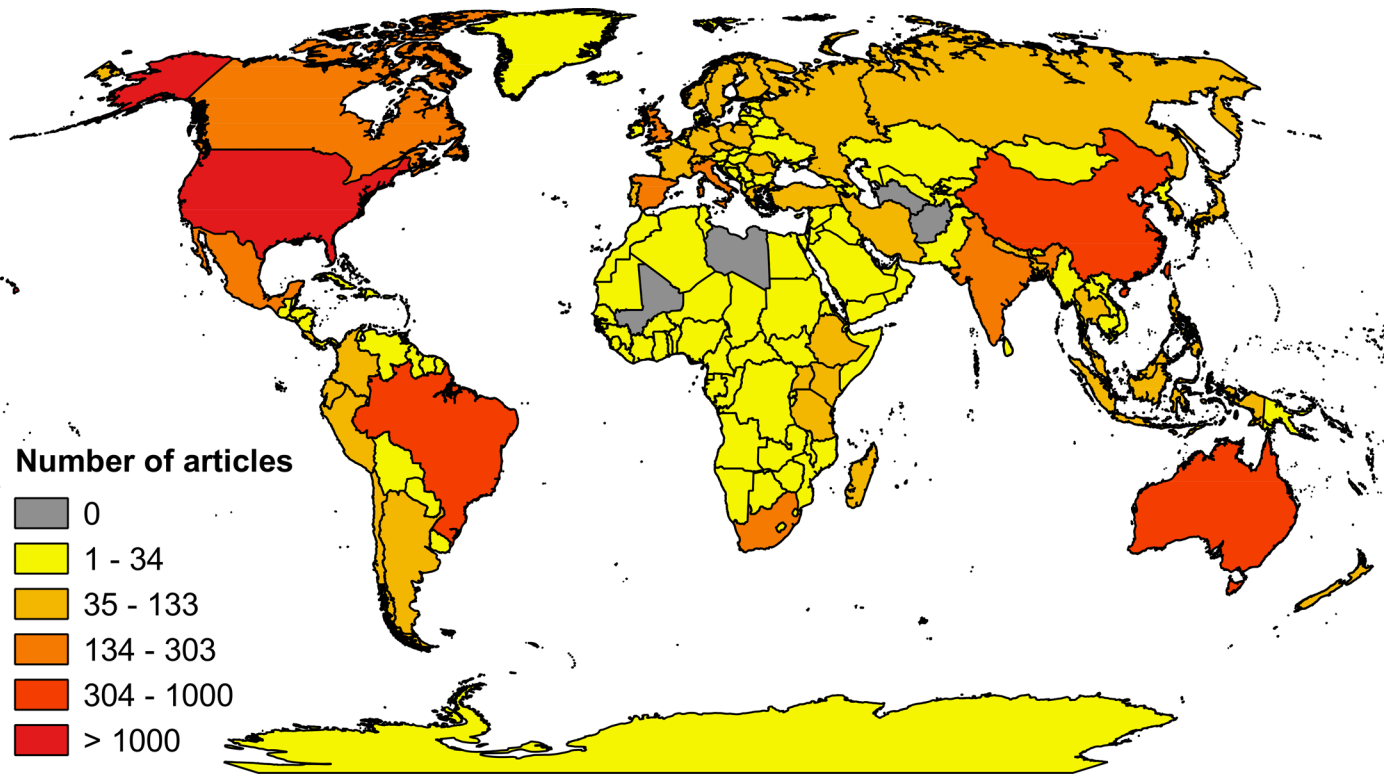

**Fig 1. Global distribution of publications on biodiversity conservation (S1 Data).**

doi:10.1371/journal.pbio.1002413.g001

that are used to inform progress against other CBD targets, such as the Living Planet Index and the Red List Index [4,5], will continue to be populated with biased data.

With comparatively fewer publications being generated, it would be ideal for these publications to be widely shared. Open access publishing is growing in popularity, but still only 14% ( $n = 809$ ) of the publications recorded in the Thomson Reuters Web of Science Core Collection database were published as open access. Only 128 of the 1,090 publications (11.7%) that focused on the ten countries of the greatest conservation importance were freely accessible (Table 1). Publishing open access can incur hefty fees, and the contemporary practice of journals is to waive publishing fees on a case-by-case basis. We encourage parent societies of key conservation journals (e.g., the Society for Conservation Biology and the Ecological Society of America) to openly commit to waiving fees for research from historically underrepresented countries, particularly those where local in-country scientists and institutions have played a significant role in the research.

It is the responsibility of the scientific community to give adequate acknowledgement of in-country scientists and institutions [6], particularly since the research conducted in the most biodiverse countries is predominately led by researchers based elsewhere. Only 23% of the Indonesian publications, 22% of the Ecuadorian, and none of the Papua New Guinean and the Dominican Republic publications were led by researchers affiliated with local institutions (Table 1). This is compared to the publications concerning the US, where 93% were led by authors based at an institution in the US. Of the countries that ranked highly according to our measures of conservation importance, Australia had the greatest rate of in-country publications (94%). Others have observed similar discrepancies, but the extent of the problem was unknown since these studies were focused on specific taxonomic groups, ecosystem services or

biomes [7–9], or a limited subset of journals [10,11] or countries [12,13]. Attribution of joint affiliations for lead authors would enable local institutions to be recognised at national levels and by international ranking systems.

While peer-reviewed publications are an important component of evidence-based policy [14], on-ground change necessitates the support of a concerned public [15]. Social media outlets are important mechanisms for widely communicating research findings. Furthermore, engagement in social media contributes to social capital and community participation by creating cohesive networks and enabling the exchange of information across diverse groups [16]. Interestingly, we find evidence that the public is more interested in the research findings from biodiverse countries, as indicated by the Altmetrics score for each publication (a measure of attention generated in social media). The average Altmetrics score for the publications concerning the top five countries for investment in mammal conservation was 14.2 ( $n = 353$ ). A publication concerning the US had the highest score (434), but overall, the publications on the US had a lower average, at 11.8 ( $n = 436$ ) (Table 1C). The impacts of the publishing biases we observe could thus be mitigated by the broad distribution of research through social media, necessitating ongoing investment by the research community in diverse communication strategies.

Target 19 also calls for the knowledge generated to be applied, but researchers from countries of high conservation importance currently have very little representation in international fora. If representation as a chair or co-chair of an International Union for Conservation of Nature (IUCN) Specialist Group (of which there are 182 across 135 groups) is regarded as a measure of impact on conservation practice, then we would conclude that researchers with impact are based predominately in the US ( $n = 44$ ) or the UK ( $n = 39$ ) (Table 1C). Similarly, for the 515 individuals (representing 90 countries) who were selected as experts for the Intergovernmental Panel on Biodiversity and Ecosystem Services (IPBES), the most frequently represented countries are the US ( $n = 23$ ), Brazil ( $n = 25$ ), and Germany ( $n = 25$ ). Of the countries ranked highest according to our measures of conservation importance, only Australia had modest levels of representation in both the IUCN specialist groups ( $n = 8$ ) and IPBES ( $n = 21$ ) (Table 1). We recommend more concerted effort to recruit scientists from the most biodiverse countries in important international fora, which will further enhance knowledge-exchange and the formation of new research collaborations.

Generating research that is of publication quality relies on a significant investment in research infrastructure and human capacity. Surprisingly, we found no correlation between the gross domestic product (GDP) per capita and the number of publications concerning each country. We did, however, find a positive correlation between expenditure on research as a proportion of GDP and the number of publications about a country ( $r = 0.21$ ;  $p < 0.05$ ) and also the proportion of those publications led by a researcher based at a local institution ( $r = 0.35$ ;  $p < 0.05$ ).

Countries where we stand to lose the most biodiversity are currently underrepresented in the peer-reviewed literature and international fora, and this situation will only be reinforced by strong publishing biases. This is a global concern and reduces our capacity to achieve international conservation targets. To mitigate the impacts of these biases, we recommend that the scientific community sponsor open access publications and widely disseminate research results through social media, give greater recognition to and acknowledgment of the contributions of local researchers and institutions, and actively seek to improve the representativeness of international fora. The greatest opportunity to redress publishing bias in conservation science lies in greater in-country investment in research. Ultimately, the onus rests on governments, the private sector, and donors to bolster in-country funding in conservation research where it is most needed.

## Supporting Information

### S1 Data.

(XLSX)

## Acknowledgments

The authors would like to thank [Altmetric.com](http://Altmetric.com) for supplying the Altmetrics data, the Arc-World Supplement for the world country shapefile, and the World Bank Development Indicators for the GDP data.

## References

1. CBD (2010) The Strategic Plan for Biodiversity 2011–2020 and the Aichi Biodiversity Targets. Decision X/2. 18 to 29 October 2010. Nagoya, Japan.
2. Wilson KA, Evans M, C., Di Marco M, Green DC, Boitani L, et al. (2011) Prioritizing conservation investments for mammal species globally. *Philosophical Transactions of the Royal Society B: Biological Sciences* 366: 2670–2680.
3. Freudenberger L, Hobson P, Schluck M, Kreft S, Vohland K, et al. (2013) Nature conservation: priority-setting needs a global change. *Biodiversity and Conservation* 22: 1255–1281.
4. Boakes EH, McGowan PJK, Fuller RA, Ding CQ, Clark NE, et al. (2010) Distorted Views of Biodiversity: Spatial and Temporal Bias in Species Occurrence Data. *PLoS Biol* 8: e1000385. doi: [10.1371/journal.pbio.1000385](https://doi.org/10.1371/journal.pbio.1000385) PMID: [20532234](https://pubmed.ncbi.nlm.nih.gov/20532234/)
5. Collen B, McRae L, Loh J, Deinet S, De Palma A, et al. (2013) Tracking Change in Abundance: The Living Planet Index. *Biodiversity Monitoring and Conservation*: Wiley-Blackwell. pp. 71–94.
6. Rodríguez JP, Taber AB, Daszak P, Sukumar R, Valladares-Padua C, et al. (2007) Globalization of conservation: a view from the South. *Science* 317: 755–756. PMID: [17690278](https://pubmed.ncbi.nlm.nih.gov/17690278/)
7. Stocks G, Seales L, Paniagua F, Maehr E, Bruna EM (2008) The Geographical and Institutional Distribution of Ecological Research in the Tropics. *Biotropica* 40: 397–404.
8. Wishart MJ, Davies BR (1998) The increasing divide between First and Third Worlds: science, collaboration and conservation of Third World aquatic ecosystems. *Freshwater Biology* 39: 557–567.
9. Levin PS, Kochin BF (2004) Publication of Marine Conservation Papers: Is Conservation Biology Too Dry? *Conservation Biology* 18: 1160–1162.
10. Fazey I, Fischer J, Lindenmayer DB (2005) Who does all the research in conservation biology? *Biodiversity & Conservation* 14: 917–934.
11. Meijaard E, Cardillo M, Meijaard EM, Possingham HP (2015) Geographic bias in citation rates of conservation research. *Conservation Biology* 29: 920–925. doi: [10.1111/cobi.12489](https://doi.org/10.1111/cobi.12489) PMID: [25817796](https://pubmed.ncbi.nlm.nih.gov/25817796/)
12. Holmgren M, Schnitzer SA (2004) Science on the Rise in Developing Countries. *PLoS Biol* 2: 10–13.
13. Karlsson S, Srebotnjak T, Gonzales P (2007) Understanding the North–South knowledge divide and its implications for policy: a quantitative analysis of the generation of scientific knowledge in the environmental sciences. *Environmental Science & Policy* 10: 668–684.
14. Pullin AS, Knight TM, Stone DA, Charman K (2004) Do conservation managers use scientific evidence to support their decision-making? *Biological Conservation* 119: 245–252.
15. Pretty J, Smith D (2004) Social Capital in Biodiversity Conservation and Management. *Conservation Biology* 18: 631–638.
16. Gil de Zúñiga H, Jung N, Valenzuela S (2012) Social Media Use for News and Individuals' Social Capital, Civic Engagement and Political Participation. *Journal of Computer-Mediated Communication* 17: 319–336.
